# Supplementary material for: Proteomic Phosphosite Analysis Identified Crucial NPM-ALK-Mediated NIPA Serine and Threonine Residues
Source: MDPI journal article supplement (doi:10.3390/ijms20164060), 2019-08-20
Supplement: s1 [file s1]

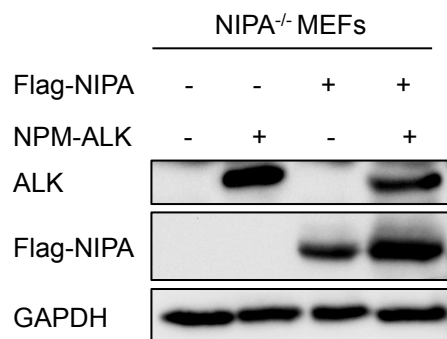

**Supplemental Figure 1: NIPA phosphorylation status upon NPM-ALK expression in immortalized MEFs.** Immunoblot analysis of NIPA<sup>-/-</sup> MEFs displaying NIPA phosphorylation indicated by a slight mobility shift in the presence of NPM-ALK.

(A)

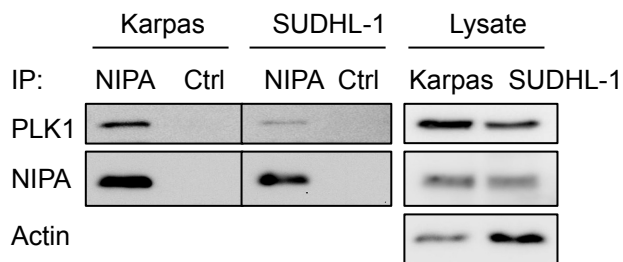

(B)

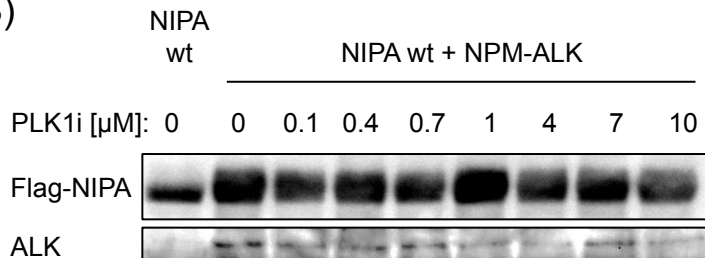

(C)

| Phosphosite | Predicted kinases         |
|-------------|---------------------------|
| S338        | ERK2, JNK1, p38MAPK       |
| S344        | ERK2, JNK1, ERK1, p38MAPK |
| S370        | p38MAPK, ERK1, JNK1       |
| S381        | Pim1/2/3, mTOR            |
| T387        | p38MAPK, JNK1, ERK1/2     |

**Supplemental Figure 2: NIPA phosphorylation caused by NPM-ALK expression is mediated by MAP kinases.** (A) NIPA-immunoprecipitation in Karpas and SUDHL-1 cells demonstrates interaction between NIPA and PLK1. (B) Hek293T cells were transfected with vectors containing NPM-ALK and Flag-NIPA followed by treatment with the PLK1 inhibitor Volasertib with indicated concentrations for 6 hours. (C) Kinases predicted by consensus sequence analysis of the identified phosphosites by PhosphoNET Kinase Predictor (Kinexus).

(A)

NIPA wt

NIPA S338/344/370/381/T387A

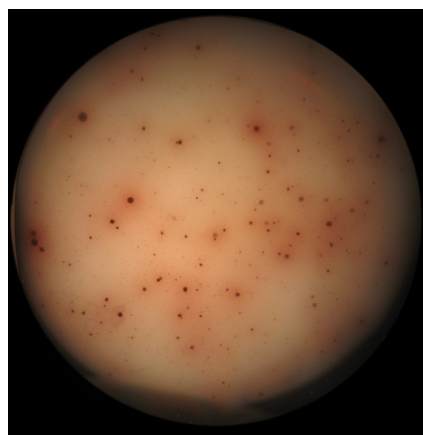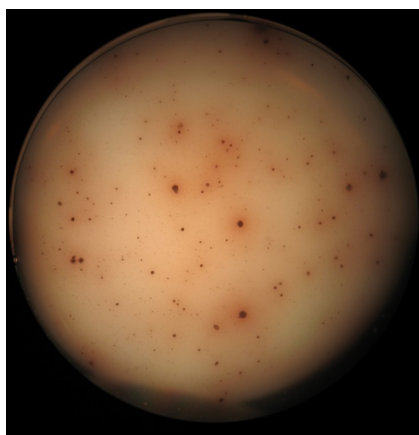

(B)

Flag-NIPA

wt S338/344/370/  
381/T387A

NPM-ALK

+

+

Flag-NIPA

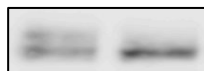

NPM-ALK

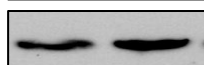

GAPDH

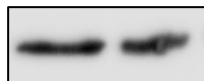

(C)

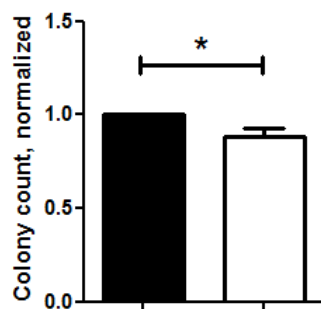

□ NIPA wt

■ NIPA S338/344/370/381/T387A

**Supplemental Figure 3: NPM-ALK-induced NIPA phosphorylation slightly increases proliferation in NPM-ALK-positive cells.** (A) Representative images of softagar assays with *Nipa*<sup>-/-</sup> MEFs expressing NPM-ALK and Flag-NIPA wt or Flag-NIPA S338/344/370/381/T387A displaying elevated colony formation in NIPA wt cells. (B) Immunoblot of *NIPA*<sup>-/-</sup> MEFs expressing NPM-ALK and NIPA wt or NIPA S338/344/370/381/T387A used for Softagar assays showing equal Flag-NIPA and NPM-ALK expression. (C) Quantification of colony formation of duplicates in three independent experiments.
